# Supplementary material for: Towards a standardized multi-tissue decellularization protocol for the derivation of extracellular matrix materials
Source: Royal Society of Chemistry journal article supplement (doi:10.1039/d2bm01012g), 2022-12-12
Supplement: d2bm01012g1.pdf [file d2bm01012g1.pdf]

## Supplementary Information

### **Towards a Standardized Multi-Tissue Decellularization Protocol for the Derivation of Extracellular Matrix Materials**

*Andreea Biehl<sup>a,b</sup>, Ana M. Gracioso Martins<sup>a,b</sup>, Zachary G. Davis<sup>a,b</sup>, Daphne Sze<sup>a,b</sup>,  
Leonard Collins<sup>c</sup>, Camilo Mora-Navarro<sup>d</sup>, Matthew B. Fisher<sup>a,b,e</sup>, Donald O. Freytes<sup>a,b\*</sup>*

<sup>a</sup>Joint Department of Biomedical Engineering, North Carolina State University & University of North Carolina-Chapel Hill, 4130 Engineering Building III, Campus Box 7115, Raleigh, NC 27695, USA

<sup>b</sup>Comparative Medicine Institute, North Carolina State University, 1060 William Moore Drive, Raleigh, NC 27606, USA

<sup>c</sup>Molecular Education, Technology and Research Innovation Center (METRIC), North Carolina State University, Dabney Hall, 2620 Yarbrough Drive, Raleigh, NC 27607, USA

<sup>d</sup>Department of Chemical Engineering, University of Puerto Rico-Mayaguez, Route 108, Mayaguez, Puerto Rico, USA

<sup>e</sup>Department of Orthopaedics, University of North Carolina School of Medicine, 102 Mason Farm Road Second Floor, Chapel Hill, NC 27514, USA

#### Corresponding Author:

\*Donald O. Freytes, Ph.D.

Associate Professor

Joint Department of Biomedical Engineering

NC State/ UNC-Chapel Hill

Biomedical Partnership Center

1001 William Moore Drive

Room 28

Raleigh, NC 27607

[dofreyte@ncsu.edu](mailto:dofreyte@ncsu.edu)

Office: 919-513-7933

**Supplementary Figures 1-5**

**Supplementary Tables 1-2**

**References**

### Immunogenic proteins and sub-units

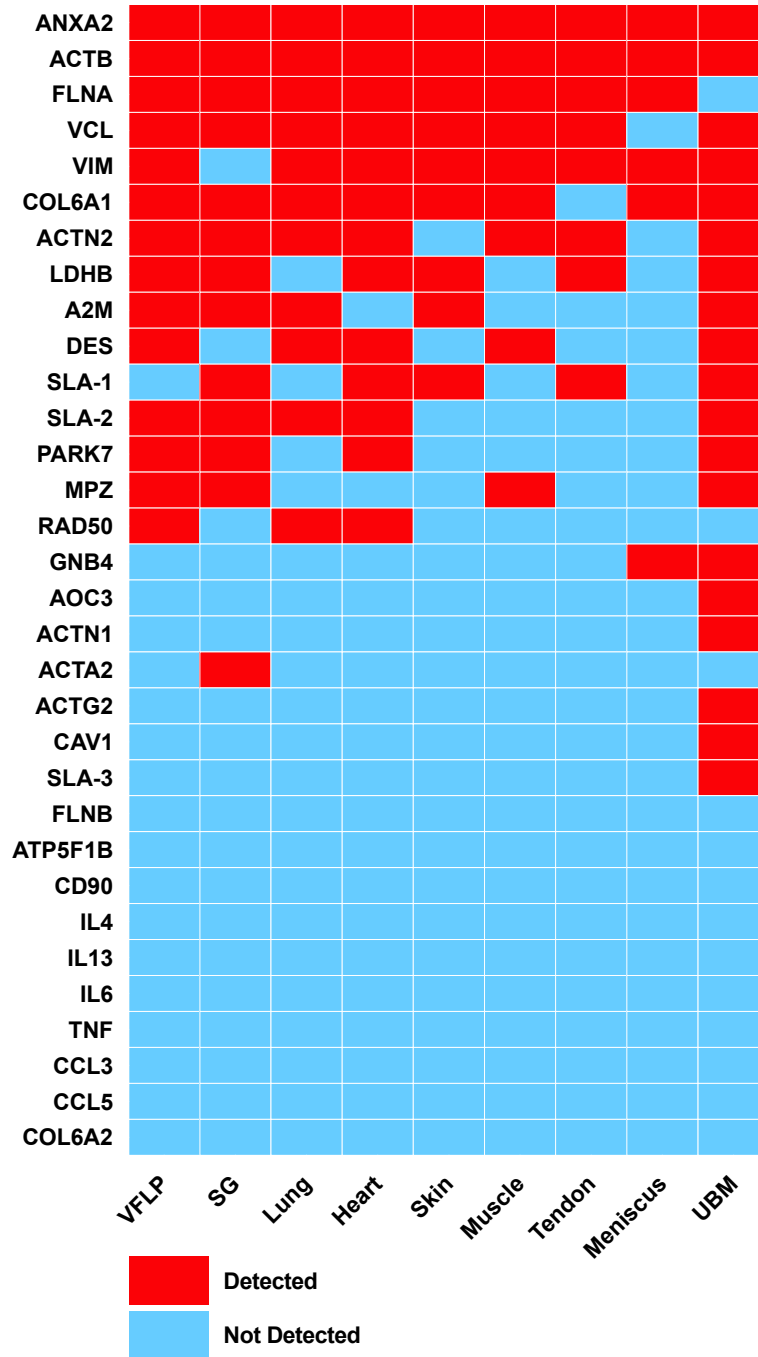

**Supplementary Figure 1.** Heatmap showing the detection or absence of immunogenic proteins and sub-units per each ECM type.<sup>1-3</sup> The database for UBM was retrieved from the study by Mora-Navarro et al. 2020.<sup>4</sup>

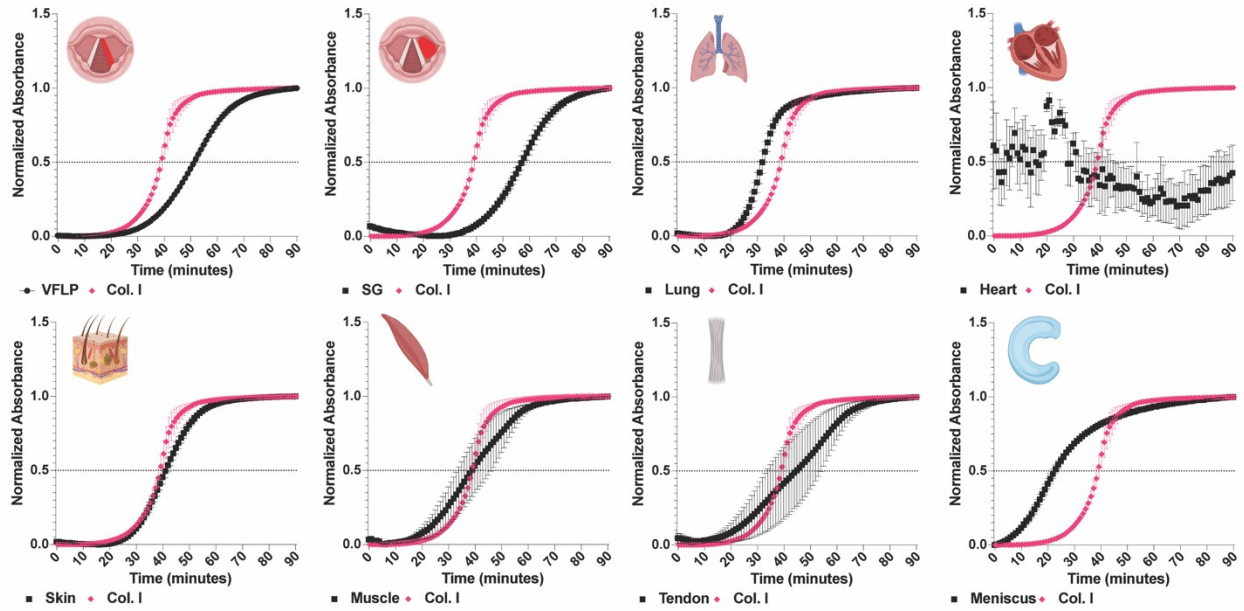

**Supplementary Figure 2.** Gelation kinetics curves based on the normalized absorbance at 405 nm for VFLP-ECM, SG-ECM, Lung-ECM, Heart-ECM, Skin-ECM, Muscle-ECM, Tendon-ECM, and Meniscus-ECM hydrogels in reference to collagen type I hydrogel (Col. I) control. The errors bars represent the SEM of three replicates.

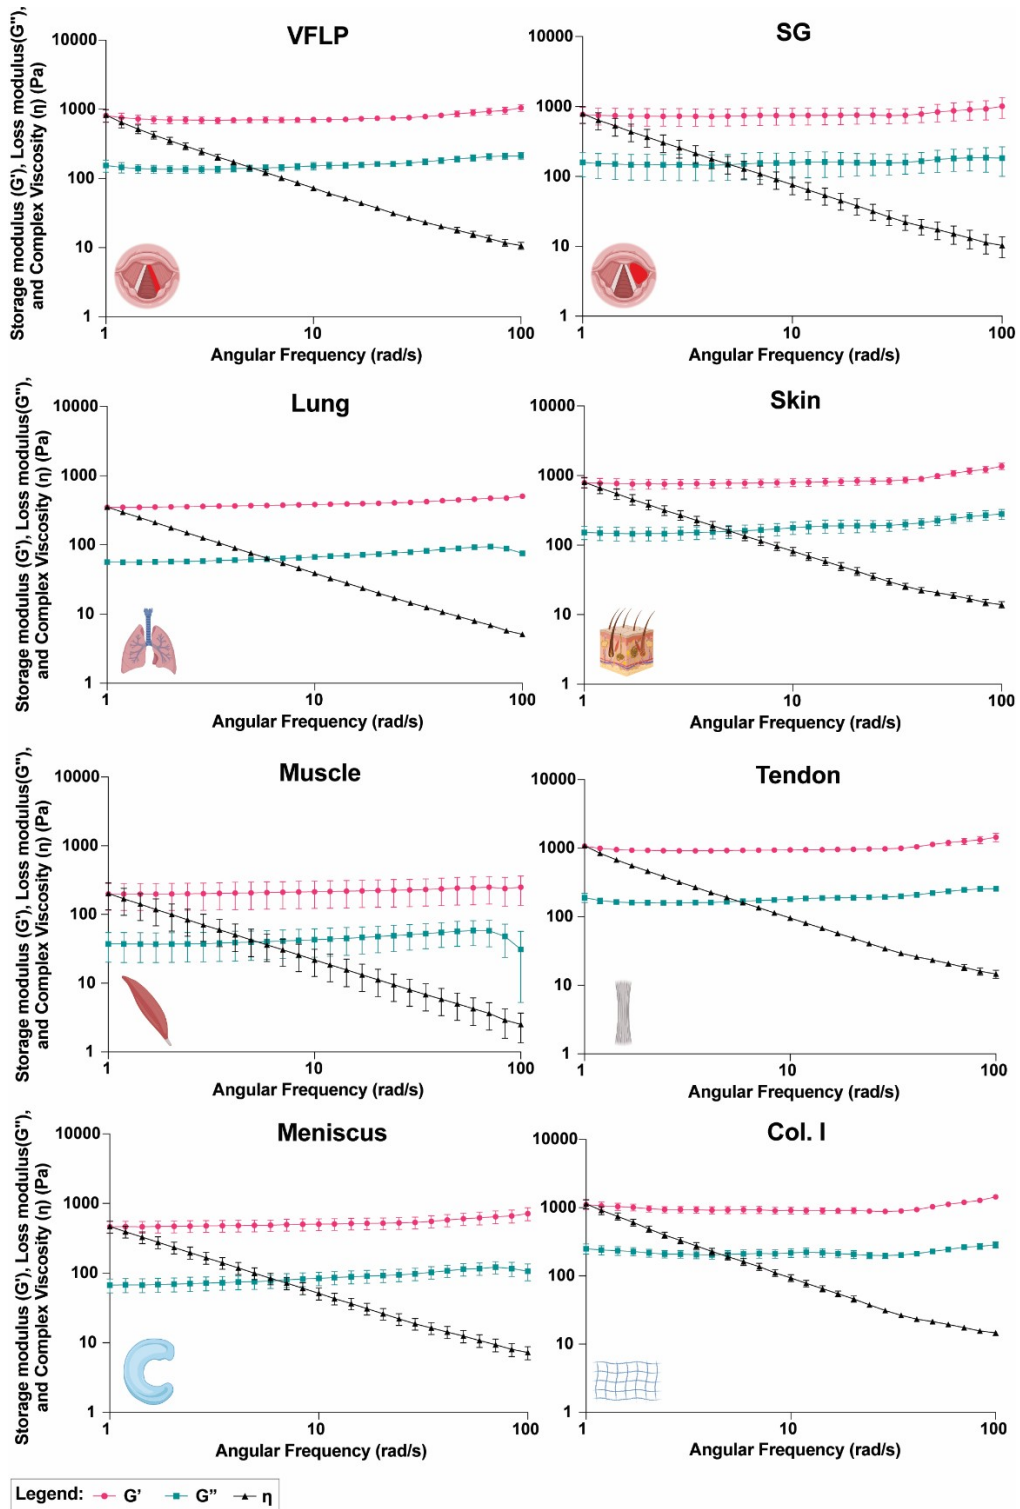

**Supplementary Figure 3.** Graphs of storage modulus ( $G'$ ), loss modulus ( $G''$ ), and complex viscosity ( $\eta$ ) for VFLP-ECM, SG-ECM, Lung-ECM, Heart-ECM, Skin-ECM, Muscle-ECM, Tendon-ECM, Meniscus-ECM hydrogels, and collagen type I hydrogel (Col. I) control plotted over an angular frequency from 1 to 100 rad/s. The errors bars represent the SEM of three replicates.

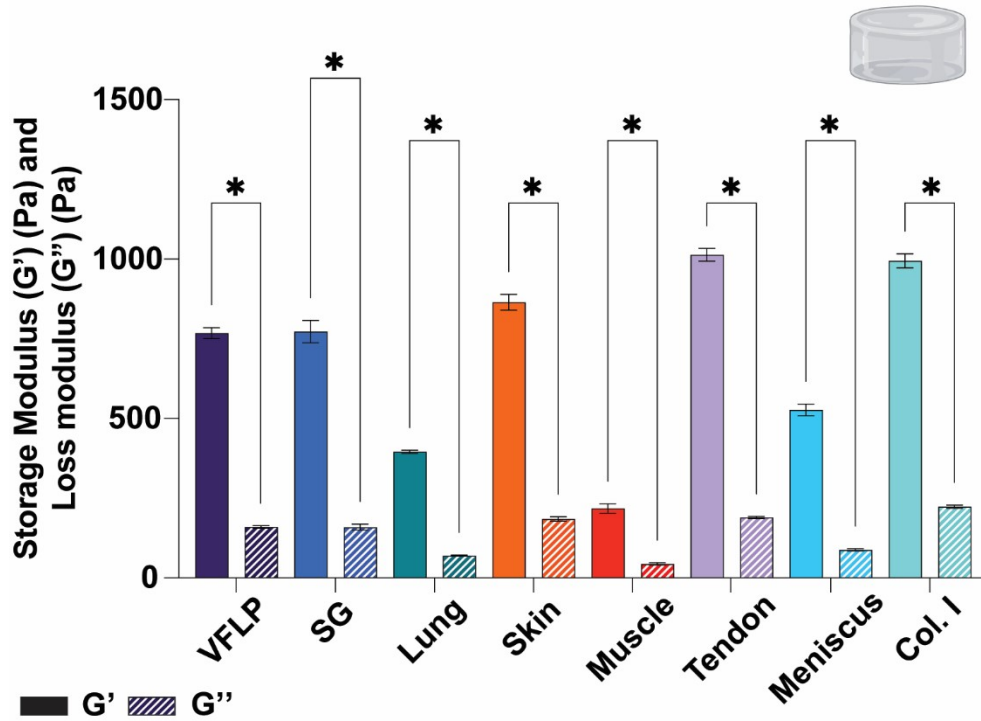

**Supplementary Figure 4.** Average storage modulus ( $G'$ ) and average loss modulus ( $G''$ ) for VFLP-, SG-, lung-, skin-, muscle-, tendon-, and meniscus-ECM, and Col. I control hydrogels prepared at 6 mg/mL. The error bars represent the standard error of the mean (SEM).  $n=3$  each. \* = statistically significant ( $P < 0.05$ ).

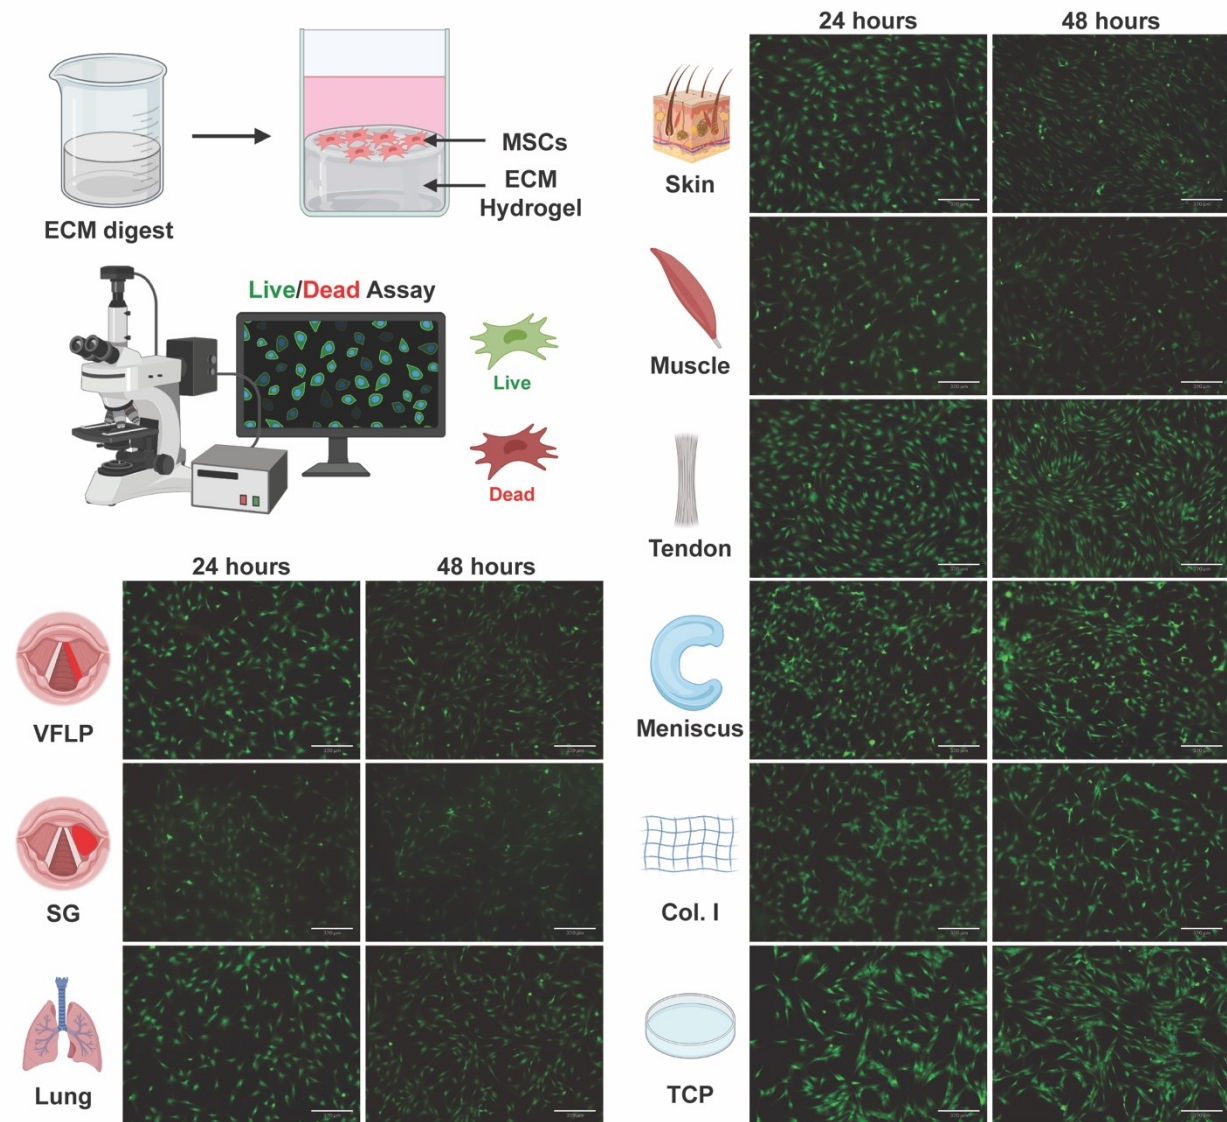

**Supplementary Figure 5.** Live/Dead viability assay for human mesenchymal stem cells (hMSCs) grown on VFLP-ECM, SG-ECM, Lung-ECM, Heart-ECM, Skin-ECM, Muscle-ECM, Tendon-ECM, Meniscus-ECM hydrogels, collagen type I hydrogel (Col. I) control, and tissue culture plastic (TCP) control. Representative images are shown for 24 and 48 hours in culture. Scale bar = 320  $\mu\text{m}$ .

**Supplementary Table 1.** Double stranded DNA quantification of native and decellularized ECM tissues (Mean  $\pm$  SEM of at least three independent experiments).

| <b>Tissue Category</b> | <b>Tissue Type</b> | <b>dsDNA in Native</b><br>( $\mu\text{g}\cdot\text{mg}^{-1}$ dry material) | <b>dsDNA in Decellularized</b><br>( $\mu\text{g}\cdot\text{mg}^{-1}$ dry material) |
|------------------------|--------------------|----------------------------------------------------------------------------|------------------------------------------------------------------------------------|
| Respiratory            | VFLP               | 10.255 $\pm$ 0.208                                                         | 1.512 $\pm$ 0.172                                                                  |
|                        | SG                 | 7.580 $\pm$ 0.977                                                          | 0.286 $\pm$ 0.042                                                                  |
|                        | Lung               | 18.422 $\pm$ 1.473                                                         | 0.474 $\pm$ 0.035                                                                  |
| Cardiac                | Heart              | 5.160 $\pm$ 0.200                                                          | 1.264 $\pm$ 0.052                                                                  |
| Dermal                 | Skin               | 2.367 $\pm$ 0.069                                                          | 0.467 $\pm$ 0.052                                                                  |
| Musculoskeletal        | Muscle             | 2.169 $\pm$ 0.180                                                          | 0.285 $\pm$ 0.026                                                                  |
|                        | Tendon             | 2.557 $\pm$ 0.439                                                          | 0.203 $\pm$ 0.077                                                                  |
|                        | Meniscus           | 1.607 $\pm$ 0.177                                                          | 0.350 $\pm$ 0.055                                                                  |

**Supplementary Table 2.** Mean and standard error of the mean (SEM) of the complex viscosity at 100, 10, and 1 Pa\*s and the storage and loss moduli averaged across the frequency sweep from 1-100 Pa\*s for each ECM type and 6mg/mL Col. I control hydrogels. \* = statistically significantly different from 6mg/mL Col. I control.

|                      |          |      | <b>Angular Frequency<br/>(rad/s)</b> |           |          | <b>Storage<br/>Modulus<br/>(Pa)</b> | <b>Loss<br/>Modulus<br/>(Pa)</b> |
|----------------------|----------|------|--------------------------------------|-----------|----------|-------------------------------------|----------------------------------|
|                      |          |      | <b>100</b>                           | <b>10</b> | <b>1</b> |                                     |                                  |
| Respiratory          | VFLP     | Mean | 10.7                                 | 72.7      | 826.8    | 767.5*                              | 159.9*                           |
|                      |          | SEM  | 1.2                                  | 6.7       | 166.5    | 16.7                                | 4.0                              |
|                      | SG       | Mean | 10.3                                 | 76.0      | 786.4    | 772.2*                              | 158.8*                           |
|                      |          | SEM  | 3.4                                  | 21.1      | 213.1    | 35.0                                | 3.6                              |
|                      | Lung     | Mean | 5.1*                                 | 38.8*     | 353.5*   | 395.9*                              | 69.9*                            |
|                      |          | SEM  | 0.2                                  | 0.8       | 7.1      | 5.031                               | 1.4                              |
| Dermal               | Skin     | Mean | 13.9                                 | 81.7      | 801.8    | 864.7*                              | 184.8*                           |
|                      |          | SEM  | 1.5                                  | 10.9      | 135.6    | 24.9                                | 7.1                              |
| Musculo-<br>skeletal | Muscle   | Mean | 2.5*                                 | 21.9*     | 202.2*   | 217.5*                              | 44.0*                            |
|                      |          | SEM  | 1.2                                  | 9.4       | 85.2     | 15.0                                | 3.2                              |
|                      | Tendon   | Mean | 14.6                                 | 95.8      | 1088.4   | 1014.0                              | 189.2*                           |
|                      |          | SEM  | 2.0                                  | 6.4       | 60.4     | 19.7                                | 3.7                              |
|                      | Meniscus | Mean | 7.2*                                 | 51.2      | 467.1*   | 526.9*                              | 87.6*                            |
|                      |          | SEM  | 1.5                                  | 9.9       | 89.2     | 18.2                                | 3.6                              |
| Control              | Col. I   | Mean | 14.7                                 | 93.9      | 1138.7   | 994.1                               | 223.6                            |
|                      |          | SEM  | 1.3                                  | 10.7      | 174.6    | 21.9                                | 5.1                              |



## References

- 1 J. Muhamed, T. Anilkumar, A. Rajan, A. Surendran and A. Jaleel, *Biomed Phys Eng Express*, 2019, 5, 025003.
- 2 J. M. Aamodt and D. W. Grainger, *Biomaterials*, 2016, 86, 68–82.
- 3 U. Boer, F. F. R. Buettner, M. Klingenberg, G. C. Antonopoulos, H. Meyer, A. Haverich and M. Wilhelmi, *Plos One*, 2014, 9, e105964.
- 4 C. Mora-Navarro, A. Badileanu, A. M. G. Martins, E. W. Ozpinar, L. Gaffney, I. Huntress, E. Harrell, J. R. Enders, X. Peng, R. C. Branski and D. O. Freytes, *Acs Biomater Sci Eng*, 2020, 6, 1690–1703.
